# Supplementary material
Source: HighWire-hosted journal article supplement (https://svn.smart01.highwire.org/content/9/6/640)

A Combined data from Switzerland and Norway

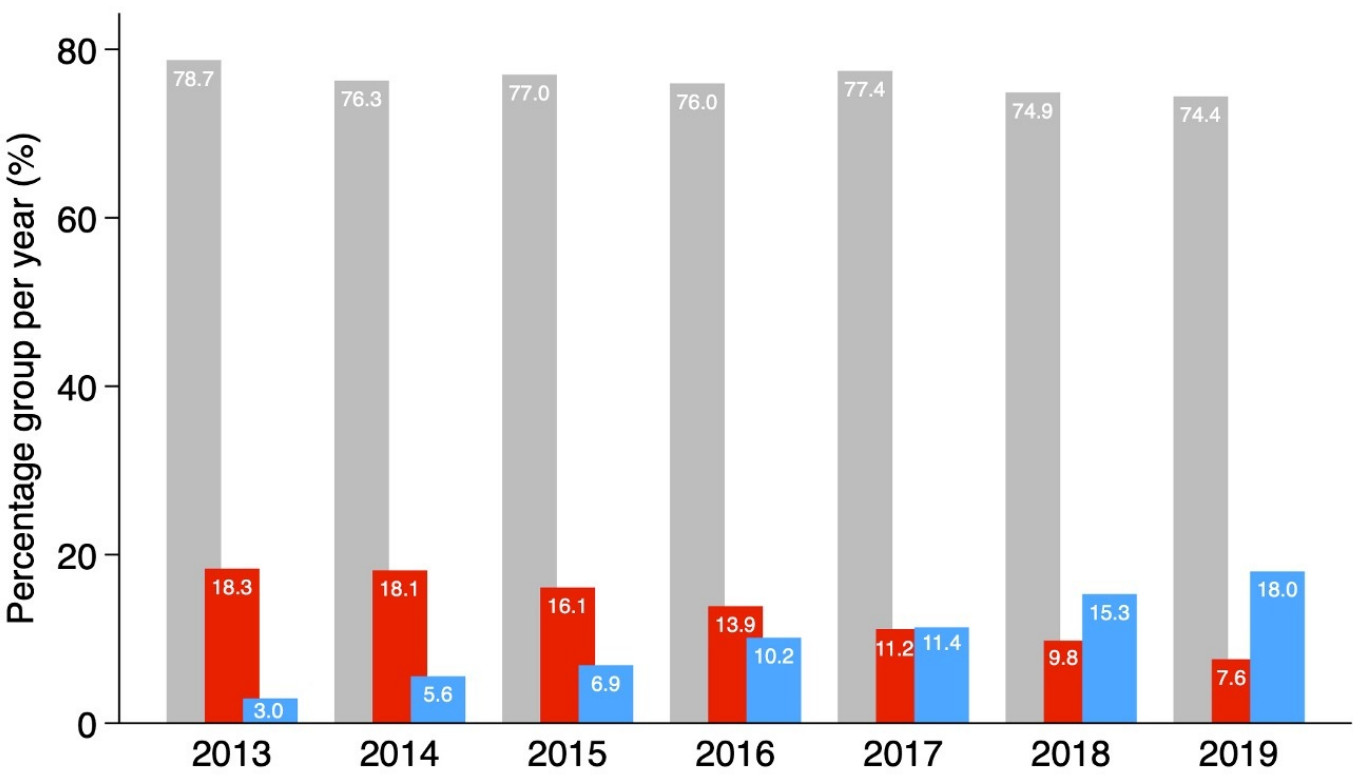

B Switzerland

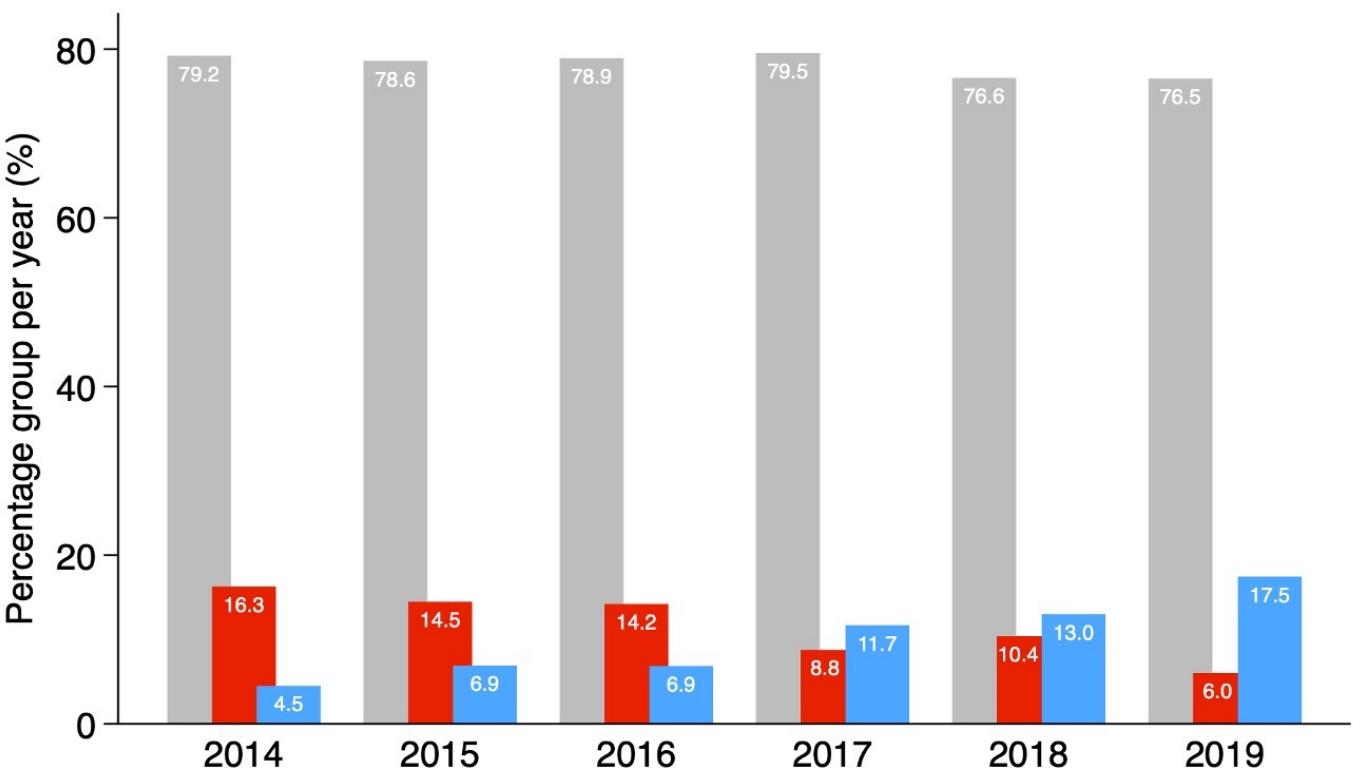

C Norway

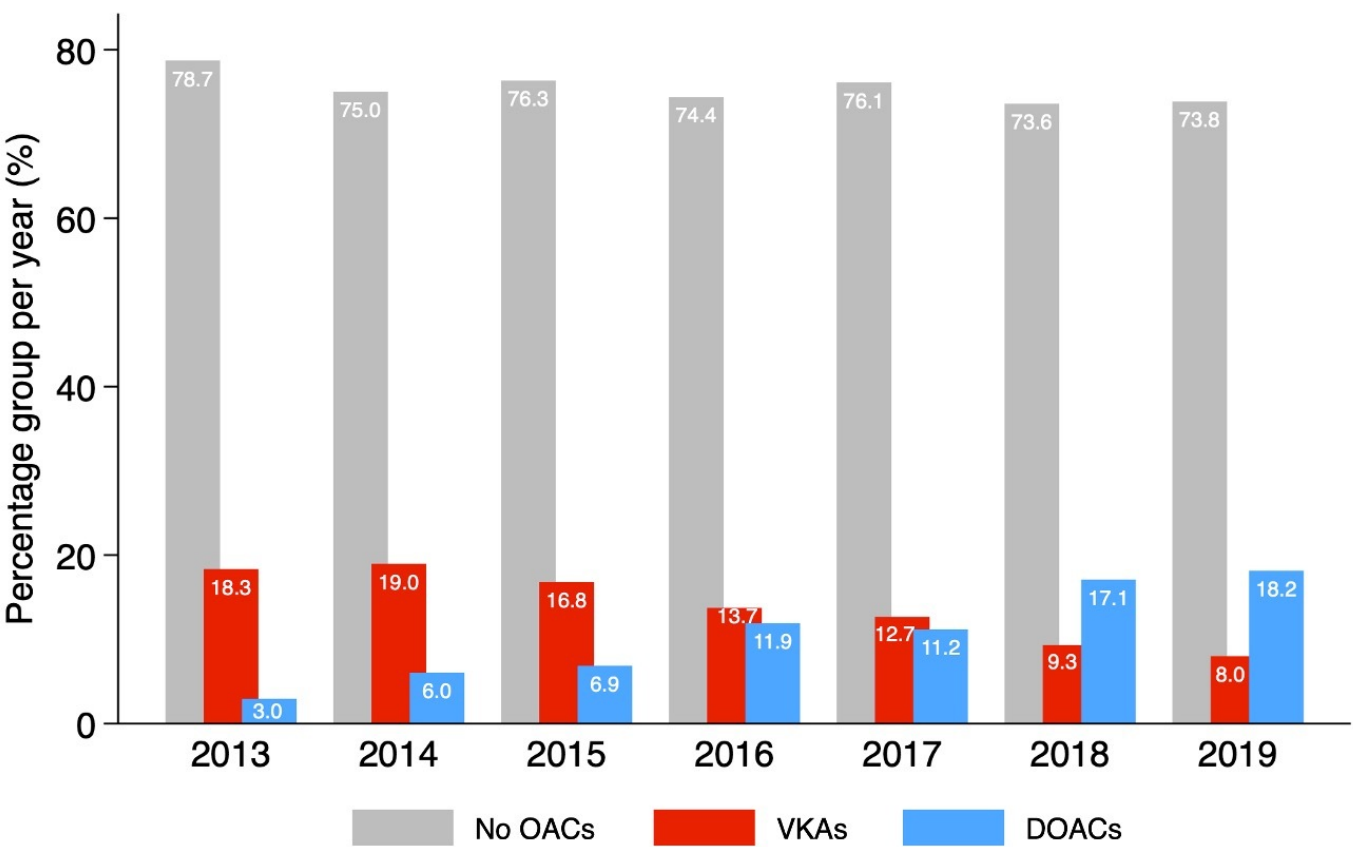

Supplement: inline-supplementary-material-2 [file inline-supplementary-material-2.pdf]
